# Supplementary material for: Examining the relation between the subjective and objective social status with health reported needs and health-seeking behaviour in Dande, Angola
Source: Springer Nature journal article supplement (doi:10.1186/s12889-021-11003-4), 2021-05-25
Supplement: MOESM1 [file 19195436]

**Supplementary File 1 – Questionnaire (English version)**

**HDSS – Model of the household questionnaire used in the 9<sup>th</sup> update round.**

**Date of interview:**

**Fieldworker:**

**Name of the Head of the household:**

**Housing characteristics**

| <b>Walls's material</b> |
|-------------------------|
| Adobe                   |
| Brick/bloc              |
| Wattle and daub         |
| Woven straw             |
| Iron sheet              |
| Wood                    |
| Other. What             |

| <b>Roof</b>      |
|------------------|
| Straw            |
| Iron sheet       |
| Roofing shingles |
| Fibrocement      |
| Other. What      |
|                  |
|                  |

| <b>Floor</b>         |
|----------------------|
| Concrete / Cement    |
| Crude floor (cement) |
| Ceramic tiles        |
| Earth                |
| Carpet               |
| Other. What          |
|                      |

|                        |  |
|------------------------|--|
| <b>Number of rooms</b> |  |
|------------------------|--|

|                              |               |
|------------------------------|---------------|
| <b>The house has kitchen</b> | <b>Yes/No</b> |
|------------------------------|---------------|

| <b>Drinking water source</b>       |
|------------------------------------|
| Public tap or standpipe            |
| Piped into dwelling or yard        |
| River                              |
| Irrigation channel                 |
| Lagoon                             |
| Well and open sources above ground |
| Borehole                           |
| Water tank                         |
| Other                              |

| <b>Treat drinking water</b>                 |
|---------------------------------------------|
| Yes/no                                      |
|                                             |
| <b>If yes, what use for treating water.</b> |
| Leaches                                     |
| Ume stone                                   |
| Boils                                       |
| Filter                                      |
| Other method                                |

| <b>Bathing water source</b>        |
|------------------------------------|
| Public tap or standpipe            |
| Piped into dwelling or yard        |
| River                              |
| Irrigation channel                 |
| Lagoon                             |
| Well and open sources above ground |
| Borehole                           |
| Water tank                         |
| Other                              |

| <b>Main cooking fuel</b> |
|--------------------------|
| Firewood                 |
| Charcoal                 |
| Kerosene                 |
| Gas                      |
| Electricity              |
| Other                    |
|                          |
|                          |

| <b>Household assets</b> |
|-------------------------|
| Electricity             |
| Generator               |
| Radio                   |
| Television              |
| Cell phone              |
| Satellite dish          |
| Fridge                  |
| Freezer                 |
|                         |

|                              |
|------------------------------|
| <b>The house has latrine</b> |
| Yes/No                       |

|                              |
|------------------------------|
| <b>If yes (with latrine)</b> |
| With water                   |
| Without water                |

|                              |
|------------------------------|
| <b>If yes (with latrine)</b> |
| Just for family              |
| Shared with neighbours       |

| <b>Transports in the household</b> |
|------------------------------------|
| Car                                |
| Motorcycle                         |
| Bicycle                            |
| Other. What                        |

| <b>Livestock Breeding</b>   |
|-----------------------------|
| Yes/No                      |
| <b>What kind of animals</b> |
|                             |

### Household income and Social Status Subjective measures

|                             |
|-----------------------------|
| <b>Monthly income (net)</b> |
|-----------------------------|

|                                    |
|------------------------------------|
| <b>Monthly income (categories)</b> |
| None                               |
| Less than 10.000 AOA               |
| Between 10.001 and 30.000 AOA      |
| Between 30.001 and 50.000 AOA      |
| Between 50.001 and 70.000 AOA      |
| More than 70.000 AOA               |
| Do not know/ Do not answer         |

|                                                                |
|----------------------------------------------------------------|
| <b>How many people in the household receive a fixed salary</b> |
| No one                                                         |
| 1 person                                                       |
| 2 persons                                                      |
| 3 persons                                                      |
| 4 persons                                                      |
| 5 or more persons                                              |
| Do not know/ Do not answer                                     |

Think of this ladder as representing where people stand in their communities – at the top of the ladder are the people who are best off, with more money, more education and who live better; at the bottom are those who are the worst off, who have the least money, least education and worse conditions. Where would you place your family on this ladder?". [Possible scores on the ladder range from 1 to 10, with higher scores indicating higher perceived social status]. **Note** The ladder was shown to respondents in A4 size.

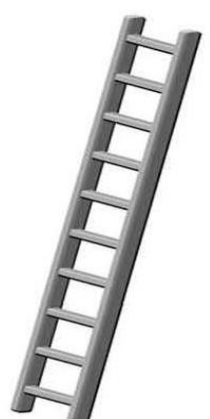

### Media exposure and Social Capital

|                                                                                                     |  |
|-----------------------------------------------------------------------------------------------------|--|
| <b>Someone in the household uses to watch television, listen the radio, read newspapers? Yes/No</b> |  |
| Television                                                                                          |  |
| Radio                                                                                               |  |
| Newspaper                                                                                           |  |
| Other                                                                                               |  |

|                                                                              |  |
|------------------------------------------------------------------------------|--|
| <b>Someone in the household belongs to some kind of collectivity. Yes/No</b> |  |
| Religious                                                                    |  |
| Cultural                                                                     |  |
| Sportif                                                                      |  |
| Civic. Other                                                                 |  |

### Health cares need and Health seeking behaviour

|                                                                                                          |
|----------------------------------------------------------------------------------------------------------|
| <b>Any ill-health or injury among household residents within the month preceding the survey (yes/no)</b> |
|----------------------------------------------------------------------------------------------------------|

|                             |
|-----------------------------|
| <b>If yes, sought help?</b> |
|-----------------------------|

| <b>If sought for help, where</b> | <b>If no, why</b>          |
|----------------------------------|----------------------------|
| Church                           | The problems disappeared   |
| Family or neighbours             | It is expensive / No money |
| Market or pharmacy               | It is far from home        |
| Heath facility                   | Too full / time consuming  |
| Traditional healers              | Other                      |
| Nurses working at home           |                            |
